# Supplementary material
Source: PubMed Central journal article supplement (PMC6660406)
Supplement: NIHMS1515396-supplement-1.pdf [file NIHMS1515396-supplement-1.pdf]

## Supplemental Material

First trimester maternal exposures to endocrine disrupting chemicals and metals and fetal size in the Michigan Mother Infant Pairs study

Jaclyn M. Goodrich<sup>1¶\*</sup>, Mary E. Ingle<sup>1¶</sup>, Steven E. Domino<sup>2</sup>, Marjorie C. Treadwell<sup>2</sup>, Dana C. Dolinoy<sup>1,3</sup>, Charles Burant<sup>4</sup>, John D. Meeker<sup>1&</sup>,  
Vasantha Padmanabhan<sup>1,2,5&</sup>

<sup>1</sup> Department of Environmental Health Sciences, University of Michigan School of Public Health, Ann Arbor, Michigan, United States of America

<sup>2</sup> Department of Obstetrics and Gynecology, University of Michigan, Ann Arbor, Michigan, United States of America

<sup>3</sup> Department of Nutritional Sciences, University of Michigan School of Public Health, Ann Arbor, Michigan, United States of America

<sup>4</sup> Department of Internal Medicine, University of Michigan, Ann Arbor, Michigan, United States of America

<sup>5</sup> Department of Pediatrics, University of Michigan, Ann Arbor, Michigan, United States of America

¶ These authors contributed equally to this work.

& These authors also contributed equally to this work.

## Table of Contents

| <b>Table</b> |                                                                                                            | <b>Page</b> |
|--------------|------------------------------------------------------------------------------------------------------------|-------------|
| S1           | Sex-Stratified Anthropometric Measures                                                                     | 3           |
| S2           | Correlations of phthalate metabolites in first trimester maternal urine samples (n=56)                     | 4           |
| S3           | Correlations of phenols in first trimester maternal urine samples (n=56)                                   | 5           |
| S4           | Correlations of metals in first trimester maternal urine samples (n=55)                                    | 6           |
| S5           | Distribution of summed chemicals among MMIP women (n=56)                                                   | 7           |
| S6           | Bivariate associations of phthalate metabolites and survey responses among MMIP women                      | 8           |
| S7           | Bivariate associations for phenols and survey responses among MMIP women                                   | 9-10        |
| S8           | Bivariate associations with bisphenol A, F, and S and canned food consumption (n=56)                       | 11          |
| S9           | Bivariate associations for metals and survey responses among MMIP women                                    | 12-13       |
| S10          | Associations between Bisphenol F and S dichotomized by detected vs. not detected and birth outcomes (n=56) | 14          |

Table S1. Sex-Stratified Anthropometric Measures

|                                  | <b>Females (n=29)</b> |               | <b>Males (n=27)</b> |               |
|----------------------------------|-----------------------|---------------|---------------------|---------------|
|                                  | <i>Median</i>         | <i>Range</i>  | <i>Median</i>       | <i>Range</i>  |
| Birthweight (g)                  | 3410                  | (2805 - 4070) | 3640                | (2860 - 4685) |
| Fenton z-score % tile            | 54.4                  | (6.6 - 85.2)  | 62.7                | (12.8 - 95.1) |
| Fetal Anthropometry <sup>a</sup> |                       |               |                     |               |
| Abdominal circ.                  | 137                   | (111 – 161)   | 140                 | (127 – 242)   |
| Biparietal diameter              | 43.4                  | (36 – 48)     | 44                  | (40 – 70.4)   |
| Femur length                     | 29.6                  | (23 – 36)     | 29.4                | (24 – 51.4)   |
| Head circ. <sup>b</sup>          | 161                   | (135 – 182)   | 164                 | (155 – 265)   |

<sup>a</sup> Units= mm; <sup>b</sup> Circ: circumference

Table S2. Correlations of phthalate metabolites in first trimester maternal urine samples (n=56)

| Phthalate | MnBP   | MBzP        | mCINP       | MCOMHP      | MCP         | MeCPP       | MEHHP       | MEHP        | MEOHP       | MEP         | MiBP        |
|-----------|--------|-------------|-------------|-------------|-------------|-------------|-------------|-------------|-------------|-------------|-------------|
| MnBP      |        | <b>0.79</b> | <b>0.65</b> | <b>0.79</b> | <b>0.68</b> | <b>0.78</b> | <b>0.77</b> | <b>0.74</b> | <b>0.79</b> | <b>0.54</b> | <b>0.81</b> |
| MBzP      | <0.001 |             | <b>0.59</b> | <b>1.00</b> | <b>0.58</b> | <b>0.73</b> | <b>0.72</b> | <b>0.70</b> | <b>0.71</b> | <b>0.29</b> | <b>0.72</b> |
| mCINP     | <0.001 | <0.001      |             | <b>0.59</b> | <b>0.88</b> | <b>0.77</b> | <b>0.66</b> | <b>0.69</b> | <b>0.67</b> | <b>0.32</b> | <b>0.60</b> |
| MCOMHP    | <0.001 | <0.001      | <0.001      |             | <b>0.58</b> | <b>0.73</b> | <b>0.72</b> | <b>0.70</b> | <b>0.71</b> | <b>0.29</b> | <b>0.71</b> |
| MCP       | <0.001 | <0.001      | <0.001      | <0.001      |             | <b>0.76</b> | <b>0.66</b> | <b>0.67</b> | <b>0.68</b> | <b>0.38</b> | <b>0.60</b> |
| MeCPP     | <0.001 | <0.001      | <0.001      | <0.001      | <0.001      |             | <b>0.92</b> | <b>0.85</b> | <b>0.92</b> | <b>0.40</b> | <b>0.76</b> |
| MEHHP     | <0.001 | <0.001      | <0.001      | <0.001      | <0.001      | <0.001      |             | <b>0.91</b> | <b>0.99</b> | <b>0.45</b> | <b>0.75</b> |
| MEHP      | <0.001 | <0.001      | <0.001      | <0.001      | <0.001      | <0.001      | <0.001      |             | <b>0.91</b> | <b>0.34</b> | <b>0.68</b> |
| MEOHP     | <0.001 | <0.001      | <0.001      | <0.001      | <0.001      | <0.001      | <0.001      | <0.001      |             | <b>0.48</b> | <b>0.76</b> |
| MEP       | <0.001 | 0.03        | 0.02        | 0.03        | 0.004       | 0.002       | 0.001       | 0.01        | <0.001      |             | <b>0.48</b> |
| MiBP      | <0.001 | <0.001      | <0.001      | <0.001      | <0.001      | <0.001      | <0.001      | <0.001      | <0.001      | 0.001       |             |

Above diagonal denotes spearman correlation; Below diagonal denotes p-value associated with correlation value

Table S3. Correlations of phenols in first trimester maternal urine samples (n=56)

| Phenol  | 2,4-DCP | 2,5-DCP     | BP-3        | BPA         | BPF         | BPS         | BuPB  | EtPb        | MePB        | PrPB        | TCS         |
|---------|---------|-------------|-------------|-------------|-------------|-------------|-------|-------------|-------------|-------------|-------------|
| 2,4-DCP |         | <b>0.64</b> | <b>0.43</b> | <b>0.65</b> | <b>0.30</b> | <b>0.5</b>  | 0.04  | <b>0.50</b> | <b>0.46</b> | 0.19        | <b>0.60</b> |
| 2,5-DCP | <0.001  |             | <b>0.29</b> | <b>0.55</b> | 0.20        | <b>0.33</b> | 0.04  | <b>0.31</b> | <b>0.31</b> | 0.04        | <b>0.44</b> |
| BP-3    | 0.001   | 0.03        |             | <b>0.30</b> | <b>0.30</b> | <b>0.26</b> | 0.06  | <b>0.44</b> | <b>0.43</b> | <b>0.33</b> | <b>0.44</b> |
| BPA     | <0.001  | <0.001      | 0.02        |             | <b>0.31</b> | <b>0.46</b> | 0.08  | <b>0.41</b> | <b>0.36</b> | 0.13        | 0.40        |
| BPF     | 0.03    | 0.14        | 0.03        | 0.02        |             | 0.12        | -0.06 | <b>0.40</b> | 0.19        | 0.24        | 0.19        |
| BPS     | <0.001  | 0.01        | 0.05        | <0.001      | 0.39        |             | 0.11  | 0.17        | <b>0.51</b> | <b>0.35</b> | <b>0.32</b> |
| BuPB    | 0.79    | 0.75        | 0.67        | 0.55        | 0.64        | 0.41        |       | 0.15        | 0.05        | 0.07        | -0.09       |
| EtPB    | <0.001  | 0.02        | 0.001       | 0.002       | 0.003       | 0.22        | 0.28  |             | <b>0.44</b> | <b>0.44</b> | <b>0.37</b> |
| MePB    | 0.003   | 0.02        | 0.001       | 0.01        | 0.15        | <0.001      | 0.72  | 0.001       |             | 0.81        | 0.45        |
| PrPB    | 0.16    | 0.79        | 0.01        | 0.32        | 0.08        | 0.01        | 0.59  | 0.001       | <0.001      |             | 0.21        |
| TCS     | <0.001  | 0.001       | 0.001       | 0.002       | 0.15        | 0.02        | 0.53  | 0.01        | 0.001       | 0.12        |             |

Above diagonal denotes spearman correlation; Below diagonal denotes p-value associated with correlation value

Table S4. Correlations of metals in first trimester maternal urine samples (n=55)

| Metal | As     | Ba          | Cd          | Cr          | Cu          | Hg          | Mn          | Mo          | Ni          | Pb          | Se          | Sn          | Tl          | Zn          |
|-------|--------|-------------|-------------|-------------|-------------|-------------|-------------|-------------|-------------|-------------|-------------|-------------|-------------|-------------|
| As    |        | <b>0.35</b> | <b>0.58</b> | <b>0.50</b> | <b>0.56</b> | <b>0.31</b> | <b>0.57</b> | <b>0.67</b> | <b>0.69</b> | <b>0.45</b> | <b>0.78</b> | <b>0.62</b> | <b>0.55</b> | <b>0.70</b> |
| Ba    | 0.01   |             | <b>0.39</b> | <b>0.54</b> | 0.15        | -0.10       | 0.13        | 0.20        | <b>0.28</b> | <b>0.29</b> | <b>0.30</b> | <b>0.36</b> | <b>0.28</b> | 0.15        |
| Cd    | <0.001 | 0.02        |             | <b>0.64</b> | <b>0.65</b> | 0.18        | <b>0.66</b> | <b>0.66</b> | <b>0.74</b> | <b>0.54</b> | <b>0.73</b> | <b>0.66</b> | <b>0.53</b> | <b>0.66</b> |
| Cr    | <0.001 | <0.001      | <0.001      |             | 0.55        | -0.09       | <b>0.54</b> | <b>0.54</b> | <b>0.58</b> | <b>0.42</b> | <b>0.59</b> | <b>0.50</b> | <b>0.45</b> | <b>0.52</b> |
| Cu    | <0.001 | 0.28        | <0.001      | <0.001      |             | 0.24        | <b>0.72</b> | <b>0.60</b> | <b>0.80</b> | <b>0.64</b> | <b>0.71</b> | <b>0.69</b> | <b>0.47</b> | <b>0.72</b> |
| Hg    | 0.02   | 0.45        | 0.19        | 0.51        | 0.07        |             | 0.22        | <b>0.29</b> | 0.24        | 0.20        | 0.21        | 0.24        | 0.19        | <b>0.30</b> |
| Mn    | <0.001 | 0.35        | <0.001      | <0.001      | <0.001      | 0.11        |             | <b>0.60</b> | <b>0.75</b> | <b>0.53</b> | <b>0.76</b> | <b>0.71</b> | <b>0.52</b> | <b>0.66</b> |
| Mo    | <0.001 | 0.15        | <0.001      | <0.001      | <0.001      | 0.03        | <0.001      |             | <b>0.72</b> | <b>0.37</b> | <b>0.74</b> | <b>0.66</b> | <b>0.42</b> | <b>0.68</b> |
| Ni    | <0.001 | 0.04        | <0.001      | <0.001      | <0.001      | 0.08        | <0.001      | <0.001      |             | <b>0.69</b> | <b>0.80</b> | <b>0.71</b> | <b>0.52</b> | <b>0.78</b> |
| Pb    | 0.001  | 0.03        | <0.001      | 0.001       | <0.001      | 0.15        | <0.001      | 0.01        | <0.001      |             | <b>0.46</b> | <b>0.59</b> | <b>0.47</b> | <b>0.56</b> |
| Se    | <0.001 | 0.02        | <0.001      | <0.001      | <0.001      | 0.13        | <0.001      | <0.001      | <0.001      | 0.001       |             | <b>0.75</b> | <b>0.51</b> | <b>0.85</b> |
| Sn    | <0.001 | 0.01        | <0.001      | <0.001      | <0.001      | 0.08        | <0.001      | <0.001      | <0.001      | <0.001      | <0.001      |             | <b>0.56</b> | <b>0.67</b> |
| Tl    | <0.001 | 0.04        | <0.001      | 0.001       | <0.001      | 0.17        | <0.001      | 0.001       | <0.001      | 0.003       | <0.001      | <0.001      |             | <b>0.48</b> |
| Zn    | <0.001 | 0.27        | <0.001      | <0.001      | <0.001      | 0.03        | <0.001      | <0.001      | <0.001      | <0.001      | <0.001      | <0.001      | <0.001      |             |

Above diagonal denotes spearman correlation; Below diagonal denotes p-value associated with correlation value

Table S5. Distribution of summed chemicals among MMIP women (n=56)

| $\Sigma$ score      | N <sup>a</sup> | Mean  | SD    | Min | P10 | P25 | P50  | P75 | P95 | P99 | Max |
|---------------------|----------------|-------|-------|-----|-----|-----|------|-----|-----|-----|-----|
| Phthalates          | 12             | 12.18 | 7.38  | 1   | 1   | 6   | 11   | 19  | 23  | 23  | 23  |
| Phenols             | 12             | 12.45 | 5.31  | 3   | 6   | 8   | 12   | 17  | 22  | 22  | 22  |
| Metals <sup>b</sup> | 17             | 17.15 | 8.58  | 3   | 6   | 10  | 18   | 25  | 30  | 32  | 32  |
| Total <sup>b</sup>  | 41             | 41.46 | 19.71 | 7   | 16  | 24  | 39.5 | 62  | 71  | 75  | 75  |

<sup>a</sup>N=number of chemicals/elements measured; <sup>b</sup>n=55 women  
 Concentration ranks assigned were 0, 1, and 2; Maximum possible score for phthalates and metals = 24, metals = 34, and total = 82

Table S6. Bivariate associations of phthalate metabolites and survey responses among MMIP women

|                   | Metabolite |              |       |      |        |      |       |              |      |             |       |             |       |      |      |      |       |      |        |      |      |             |
|-------------------|------------|--------------|-------|------|--------|------|-------|--------------|------|-------------|-------|-------------|-------|------|------|------|-------|------|--------|------|------|-------------|
|                   | MnBP       |              | MBzP  |      | MCOMHP |      | mCINP |              | MCP  |             | meCPP |             | MEHHP |      | MEHP |      | MEOHP |      | MEP    |      | MiBP |             |
|                   | M          | p            | M     | p    | M      | p    | M     | p            | M    | p           | M     | p           | M     | p    | M    | p    | M     | p    | M      | p    | M    | p           |
| P&C <sup>a</sup>  |            | 0.14         |       | 0.76 |        | 0.75 |       | 0.90         |      | 0.50        |       | 0.50        |       | 0.26 |      | 0.23 |       | 0.18 |        | 0.10 |      | 0.36        |
| No                | 1.55       |              | 7.52  |      | 7.51   |      | 2.70  |              | 4.07 |             | 8.94  |             | 8.27  |      | 2.01 |      | 3.92  |      | 22.46  |      | 6.45 |             |
| Yes               | 2.04       |              | 15.99 |      | 15.99  |      | 1.90  |              | 4.55 |             | 8.87  |             | 9.33  |      | 3.18 |      | 5.20  |      | 83.71  |      | 6.09 |             |
| Hair <sup>a</sup> |            | 0.42         |       | 0.06 |        | 0.06 |       | 0.31         |      | 0.09        |       | 0.12        |       | 0.08 |      | 0.08 |       | 0.08 |        | 0.42 |      | 0.23        |
| No                | 11.22      |              | 13.10 |      | 13.10  |      | 2.18  |              | 6.66 |             | 10.99 |             | 12.25 |      | 3.96 |      | 7.15  |      | 166.74 |      | 7.97 |             |
| Yes               | 11.60      |              | 14.31 |      | 14.30  |      | 2.07  |              | 3.77 |             | 8.24  |             | 8.12  |      | 2.58 |      | 4.22  |      | 40.09  |      | 5.63 |             |
| FF <sup>b</sup>   |            | <b>0.004</b> |       | 0.10 |        | 0.10 |       | <b>0.002</b> |      | <b>0.04</b> |       | <b>0.02</b> |       | 0.20 |      | 0.17 |       | 0.14 |        | 0.17 |      | <b>0.01</b> |
| No                | 17.51      |              | 15.90 |      | 15.90  |      | 1.44  |              | 2.51 |             | 6.15  |             | 7.49  |      | 2.50 |      | 3.80  |      | 79.30  |      | 4.24 |             |
| Yes               | 8.19       |              | 10.66 |      | 10.66  |      | 3.24  |              | 7.91 |             | 13.81 |             | 11.95 |      | 3.63 |      | 6.68  |      | 51.84  |      | 9.65 |             |

<sup>a</sup> no (n=13) yes (n=43); <sup>b</sup> no (n=36) yes (n=20)

M: Median; p: p-value; P&C: Perfume and Cosmetics; Hair: Haircare Products; FF: Fast Food; FV: Fresh Vegetables



Table S7. Bivariate associations for phenols and survey responses among MMIP women

|                    |     | Phenols |      |         |             |       |             |      |      |      |             |      |      |
|--------------------|-----|---------|------|---------|-------------|-------|-------------|------|------|------|-------------|------|------|
|                    |     | 2,4-DCP |      | 2,5-DCP |             | BP-3  |             | BPA  |      | BPF  |             | BPS  |      |
|                    |     | M       | P    | M       | P           | M     | P           | M    | P    | M    | P           | M    | P    |
| Perfume & Cosmetic |     |         | 0.31 |         | 0.30        |       | 0.80        |      | 0.63 |      | 0.84        |      | 0.06 |
|                    | No  | 0.23    |      | 0.20    |             | 58.22 |             | 0.72 |      | 0.14 |             | 0.14 |      |
|                    | Yes | 0.33    |      | 0.29    |             | 49.64 |             | 0.83 |      | 0.14 |             | 0.14 |      |
| Hair products      |     |         | 0.57 |         | 0.35        |       | <b>0.01</b> |      | 0.34 |      | 0.75        |      | 0.82 |
|                    | No  | 0.24    |      | 0.22    |             | 51.24 |             | 0.70 |      | 0.14 |             | 0.14 |      |
|                    | Yes | 0.74    |      | 0.61    |             | 47.12 |             | 1.06 |      | 0.14 |             | 0.14 |      |
| Canned Food        |     |         | 0.66 |         | 0.50        |       | 0.60        |      | 0.57 |      | <b>0.03</b> |      | 0.76 |
|                    | No  | 0.25    |      | 0.22    |             | 39.52 |             | 0.83 |      | 0.14 |             | 0.14 |      |
|                    | Yes | 0.34    |      | 0.31    |             | 58.22 |             | 0.64 |      | 0.14 |             | 0.14 |      |
| Fast food          |     |         | 0.11 |         | <b>0.03</b> |       | 0.75        |      | 0.40 |      | 0.50        |      | 0.37 |
|                    | No  | 0.24    |      | 0.22    |             | 51.24 |             | 0.70 |      | 0.14 |             | 0.14 |      |
|                    | Yes | 0.74    |      | 0.61    |             | 47.12 |             | 1.06 |      | 0.14 |             | 0.14 |      |

Note: Equivalent medians may result from low detection rates

Table S7 cont'd. Bivariate associations for phenols and survey responses among MMIP women

|                    | Phenols |      |      |      |       |             |       |      |       |             |
|--------------------|---------|------|------|------|-------|-------------|-------|------|-------|-------------|
|                    | BuPB    |      | EtPb |      | MePB  |             | PrPB  |      | TCS   |             |
|                    | M       | P    | M    | P    | M     | P           | M     | P    | M     | P           |
| Perfume & Cosmetic |         | 0.28 |      | 0.69 |       | 0.06        |       | 0.24 |       | 0.64        |
| No                 | 0.14    |      | 0.73 |      | 15.55 |             | 6.88  |      | 13.20 |             |
| Yes                | 0.14    |      | 0.42 |      | 93.60 |             | 15.32 |      | 17.05 |             |
| Hair products      |         | 0.64 |      | 0.86 |       | 0.21        |       | 0.35 |       | 0.21        |
| No                 | 0.14    |      | 0.28 |      | 25.27 |             | 7.51  |      | 11.18 |             |
| Yes                | 0.14    |      | 2.31 |      | 98.38 |             | 22.16 |      | 28.95 |             |
| Canned Food        |         | 0.72 |      | 0.66 |       | 0.71        |       | 0.81 |       | 0.87        |
| No                 | 0.14    |      | 1.00 |      | 75.87 |             | 7.96  |      | 15.47 |             |
| Yes                | 0.14    |      | 0.48 |      | 53.06 |             | 15.32 |      | 13.74 |             |
| Fast food          |         | 0.57 |      | 0.08 |       | <b>0.03</b> |       | 0.08 |       | <b>0.03</b> |
| No                 | 0.14    |      | 0.28 |      | 25.27 |             | 7.51  |      | 11.18 |             |
| Yes                | 0.14    |      | 2.31 |      | 98.38 |             | 22.16 |      | 28.95 |             |

Table S8. Bivariate associations with bisphenol A, F, and S and canned food consumption (n=56)

|                         | Bisphenol |         |      |             |      |         |
|-------------------------|-----------|---------|------|-------------|------|---------|
|                         | BPA       |         | BPF  |             | BPS  |         |
|                         | M         | p-value | M    | p-value     | M    | p-value |
| Canned food consumption |           | 0.57    |      | <b>0.03</b> |      | 0.76    |
| No                      | 0.83      |         | 0.14 |             | 0.14 |         |
| Yes                     | 0.64      |         | 0.14 |             | 0.14 |         |
| Canned food frequency   |           | 0.21    |      | <b>0.02</b> |      | 0.58    |
| None                    | 1.20      |         | 0.32 |             | 0.25 |         |
| ≤ 1 serving/day         | 1.34      |         | 1.39 |             | 0.32 |         |
| 2-3 servings/day        | 4.58      |         | 6.52 |             | 0.26 |         |
| ≥ 4 servings/day        | -         |         | -    |             | -    |         |

M: Median

Table S9. Bivariate associations for metals and survey responses among MMIP women

|                    | Metals |      |      |      |      |      |      |      |       |      |      |      |      |      |
|--------------------|--------|------|------|------|------|------|------|------|-------|------|------|------|------|------|
|                    | As     |      | Ba   |      | Cd   |      | Cr   |      | Cu    |      | Hg   |      | Mn   |      |
|                    | M      | P    | M    | P    | M    | P    | M    | P    | M     | P    | M    | P    | M    | P    |
| Perfume & Cosmetic |        | 0.26 |      | 0.82 |      | 0.14 |      | 0.37 |       | 0.93 |      | 0.33 |      | 0.27 |
| No                 | 2.75   |      | 5.96 |      | 0.04 |      | 0.59 |      | 7.76  |      | 0.09 |      | 1.24 |      |
| Yes                | 4.26   |      | 4.60 |      | 0.06 |      | 0.72 |      | 9.36  |      | 0.04 |      | 1.67 |      |
| Hair products      |        | 0.46 |      | 0.39 |      | 0.49 |      | 0.75 |       | 0.49 |      | 0.70 |      | 0.09 |
| No                 | 4.57   |      | 2.95 |      | 0.07 |      | 0.71 |      | 9.69  |      | 0.07 |      | 1.97 |      |
| Yes                | 3.68   |      | 4.91 |      | 0.04 |      | 0.71 |      | 9.13  |      | 0.06 |      | 1.40 |      |
| Canned Food        |        | 0.21 |      | 0.48 |      | 0.41 |      | 0.57 |       | 0.79 |      | 0.08 |      | 0.85 |
| No                 | 3.66   |      | 4.60 |      | 0.04 |      | 0.69 |      | 7.66  |      | 0.04 |      | 1.54 |      |
| Yes                | 4.47   |      | 4.73 |      | 0.51 |      | 0.72 |      | 10.40 |      | 0.08 |      | 1.54 |      |
| Fast food          |        | 0.40 |      | 0.28 |      | 0.02 |      | 0.34 |       | 0.07 |      | 0.64 |      | 0.15 |
| No                 | 3.68   |      | 4.10 |      | 0.04 |      | 0.68 |      | 7.33  |      | 0.04 |      | 1.28 |      |
| Yes                | 4.47   |      | 4.82 |      | 0.13 |      | 0.83 |      | 11.83 |      | 0.06 |      | 1.74 |      |

M: Median; P: P-value

Table S9 cont'd. Bivariate associations for metals and survey responses among MMIP women

|                  | Metals |      |      |      |      |      |       |             |      |             |      |      |        |             |
|------------------|--------|------|------|------|------|------|-------|-------------|------|-------------|------|------|--------|-------------|
|                  | Mo     |      | Ni   |      | Pb   |      | Se    |             | Sn   |             | Tl   |      | Zn     |             |
|                  | M      | P    | M    | P    | M    | P    | M     | P           | M    | P           | M    | P    | M      | P           |
| Perf. & Cosmetic |        | 0.71 |      | 0.23 |      | 0.21 |       | 0.28        |      | 0.28        |      | 0.28 |        | 0.61        |
| No               | 50.13  |      | 2.73 |      | 0.13 |      | 33.82 |             | 0.19 |             | 0.15 |      | 171.04 |             |
| Yes              | 47.27  |      | 4.80 |      | 0.25 |      | 51.85 |             | 0.38 |             | 0.19 |      | 235.48 |             |
| Hair products    |        | 0.13 |      | 0.55 |      | 0.42 |       | 0.29        |      | 0.58        |      | 0.11 |        | 0.52        |
| No               | 68.30  |      | 4.94 |      | 0.23 |      | 52.82 |             | 0.45 |             | 0.20 |      | 200.82 |             |
| Yes              | 40.47  |      | 3.91 |      | 0.21 |      | 44.51 |             | 0.27 |             | 0.17 |      | 178.03 |             |
| Canned Food      |        | 0.06 |      | 0.48 |      | 0.11 |       | 0.30        |      | 0.09        |      | 0.60 |        | 0.32        |
| No               | 41.25  |      | 3.91 |      | 0.17 |      | 42.13 |             | 0.29 |             | 0.15 |      | 169.82 |             |
| Yes              | 61.00  |      | 5.01 |      | 0.28 |      | 50.98 |             | 0.39 |             | 0.20 |      | 254.41 |             |
| Fast food        |        | 0.07 |      | 0.06 |      | 0.31 |       | <b>0.01</b> |      | <b>0.02</b> |      | 0.22 |        | <b>0.02</b> |
| No               | 40.47  |      | 3.16 |      | 0.17 |      | 36.05 |             | 0.18 |             | 0.15 |      | 170.65 |             |
| Yes              | 81.86  |      | 4.92 |      | 0.28 |      | 66.06 |             | 0.50 |             | 0.19 |      | 332.71 |             |

M: Median; P: P-value

Table S10. Associations between Bisphenol F and S dichotomized by detected vs. not detected and birth outcomes (n=56)

| Phenol | Birth outcomes                |                          |             |                             |                       |             |
|--------|-------------------------------|--------------------------|-------------|-----------------------------|-----------------------|-------------|
|        | Birth weight (g) <sup>a</sup> |                          |             | Fenton z-score <sup>b</sup> |                       |             |
|        | $\beta$                       | (95% CI)                 | p-value     | B                           | (95% CI)              | p-value     |
| BPF    | -7.88                         | (-270.32, 254.56)        | 0.95        | -0.18                       | (-0.73, 0.37)         | 0.52        |
| BPS    | <b>-220.10</b>                | <b>(-424.94, -15.26)</b> | <b>0.04</b> | <b>-0.51</b>                | <b>(-0.94, -0.07)</b> | <b>0.02</b> |

<sup>a</sup> Adjusted for Specific gravity, gestational age, and gender; <sup>b</sup> Adjusted for Specific gravity;
